# Supplementary material for: Switching of photoinduced proton transfer from one six-membered hydrogen-bonded ring to other: a molecule of hydrazine and pH sensor
Source: Royal Society of Chemistry journal article supplement (doi:10.1039/d4cp01998a), 2024-01-01
Supplement: d4cp01998a1.pdf [file d4cp01998a1.pdf]

## **Switching of Photoinduced Proton Transfer from One Six Member Hydrogen Bonded Ring to Other: A Molecule of Hydrazine and pH Sensor**

*VikiBhakta, Nikhil Guchhait\**

Department of Chemistry, University of Calcutta, 92, A.P.C. Road, Kolkata-700009, India

\*Corresponding author. Tel.: +913323508386; fax: +913323519755

E-mail address: nguchhait@yahoo.com (N. Guchhait)

- 1. Synthesis Procedure of HBO, HBOB, HBON**
- 2. Time Correlated Single photon counting (TCSPC)**
- 3. Quantum yield**
- 4. <sup>1</sup>H NMR of HBO in CDCl<sub>3</sub>**
- 5. <sup>1</sup>H NMR of HBOB in CDCl<sub>3</sub>**
- 6. <sup>13</sup>C NMR of HBOB in CDCl<sub>3</sub>**
- 7. ESI-MS of HBOB**
- 8. <sup>1</sup>H NMR of HBN in CDCl<sub>3</sub>**
- 9. <sup>13</sup>C NMR of HBN in CDCl<sub>3</sub>**
- 10. <sup>1</sup>H NMR of HBON in CDCl<sub>3</sub>**
- 11. <sup>13</sup>C NMR of HBON in CDCl<sub>3</sub>**
- 12. ESI-MS of HBON**
- 13. Table for Crystallographic parameter of HBOB**
- 14. All Steady-State Spectra of HBO**
- 15. Table of Steady State Spectra of HBO**
- 16. All Steady-State Spectra of HBOB**
- 17. Table of Steady State Spectra of HBOB**
- 18. All Steady-State Spectra of HB**
- 19. Table of Steady State Spectra of HB**
- 20. All Steady-State Spectra of HBN**
- 21. Table of Steady State Spectra of HBN**
- 22. All Steady-State Spectra of HBON**
- 23. Table of Steady State Spectra of HBON**
- 24. TCSPC spectra of HBO**
- 25. Table for TCSPC of HBO**
- 26. TCSPC spectra of HBOB**
- 27. Table for TCSPC of HBOB**
- 28. TCSPC spectra of HB**
- 29. Table for TCSPC of HB**
- 30. TCSPC spectra of HBON**
- 31. Table for TCSPC of HBON**
- 32. Dynamic Light Scattering spectra**
- 33. Solvent abbreviation Index**

### **Synthesis Procedure of HBO, HBOB, HBON:**

An ethanolic solution (2mmol) of 2-hydroxy-5-bromobenzaldehyde (**HB**) was treated with an equivalent amount of 2-aminophenol. Then the mixture was allowed to reflux overnight under magnetic stirrer to obtain our desire Schiff base (E)-4-bromo-2-(((2-hydroxyphenyl)imino)methyl)phenol with 82% yield. This was collected by suction filtration, washed with ethanol (20 mL) and dried in openair for 24 hours and the product is characterized by NMR spectroscopy. To a stirred solution of 5mmol of this Schiff in DCM, 9mmol of DDQ was added and allowed to stir for overnight to get 2-(benzo[d]oxazol-2-yl)-4-bromophenol (**HBO**). Then filtrate was collected and purified by column chromatography using ethyl acetate-hexane mixture eluent with 70% yield. **HBO** was characterized using NMR (Figure S1). The compound **HBO** (2mmol) was suspended in 20mL of glacial acetic acid and treated with 10mmol of hexamethylenetetramine (HMTA). The reaction mixture was refluxed with stirring for 20 h, after which thin-layer chromatography (TLC) analysis showed complete consumption of the starting material. The reaction mixture was then poured onto 100mL chilled 2M HCl solution, whereupon a reddish brown precipitate appeared while being stirred. The solid was filtered, washed with 50mL of water in portions, and dried for overnight in vacuum. The product 3-(benzo[d]oxazol-2-yl)-5-bromo-2-hydroxybenzaldehyde (**HBOB**) was purified by column chromatography using ethyl acetate-hexane mixture eluent with 70% yield and characterized using NMR and ESI-MS (Figure S2-S4). A methanolic solution (2mmol) of **HBOB** was treated with an equivalent amount of hydrazine hydrate. Then the mixture was allowed to reflux 8 hours under the magnetic stirrer to obtain our desire Schiff base (E)-2-(benzo[d]oxazol-2-yl)-4-bromo-6-(hydrazonomethyl) phenol (**HBON**) with 82% yield. This was collected by suction filtration, washed with ethanol (30 mL) and dried in openair for 24 hours and the product is characterized by NMR spectroscopy (Figure S7-S9).

## Time Correlated Single Photon Counting (TCSPC) Measurement

The equation for fluorescence decay is the following

$$I(t) = A + \sum_i^n B_i e^{-\frac{t}{\tau_i}}$$

$\tau_1, \tau_2, \tau_3$  = Excited state lifetime of components

$B_1, B_2, B_3$  = Normalized Pre-exponential Function

$$I(t) = A + B_1 e^{-\frac{t}{\tau_1}} + B_2 e^{-\frac{t}{\tau_2}} + B_3 e^{-\frac{t}{\tau_3}}$$

$$\text{Relative Amplitude} = \frac{B_i \tau_i}{\sum_i^n B_i \tau_i}$$

## Quantum Yield Measurement:

Utilizing the conventional approach, the fluorescence quantum yield of the chemical in different solvents with different polarity levels was calculated using the following equation in relation to the standard coumarin 153 molecule, whose quantum yield is known ( $\Phi=0.95$  in ethanol medium):

$$\Phi_s = \Phi_R \times \frac{A_S}{A_R} \times \frac{(Abs)_R}{(Abs)_S} \times \frac{\eta_s^2}{\eta_R^2}$$

Where, 'A' denotes for area under the curve of the fluorescence spectra, '(Abs)' and ' $\eta$ ' denotes the absorbance value and the refractive index of the solvents respectively. ' $\Phi$ ' refers

to the fluorescence quantum yield of the corresponding compounds. Subscripts 'R' and 'S' denote reference and sample, respectively. We have added this part in the supporting information file.

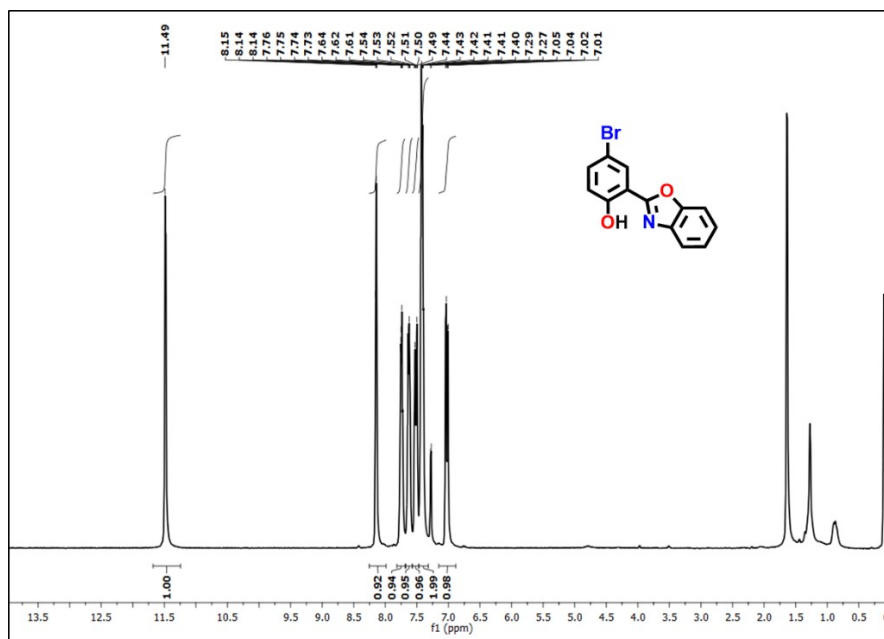

Figure S1:  $^1\text{H}$  NMR spectrum of HBO in  $\text{CDCl}_3$

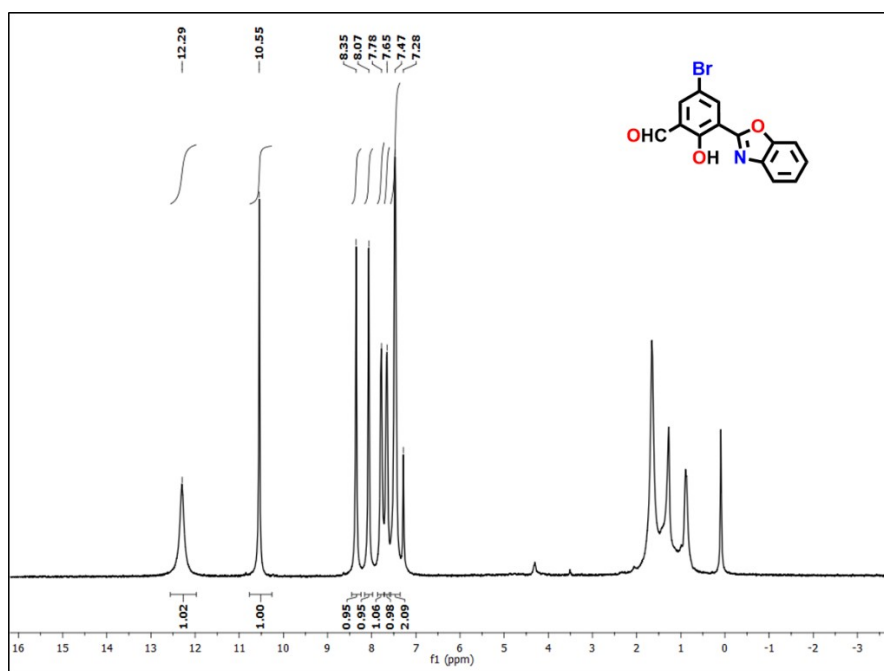

Figure S2:  $^1\text{H}$  NMR spectrum of HBOB in  $\text{CDCl}_3$

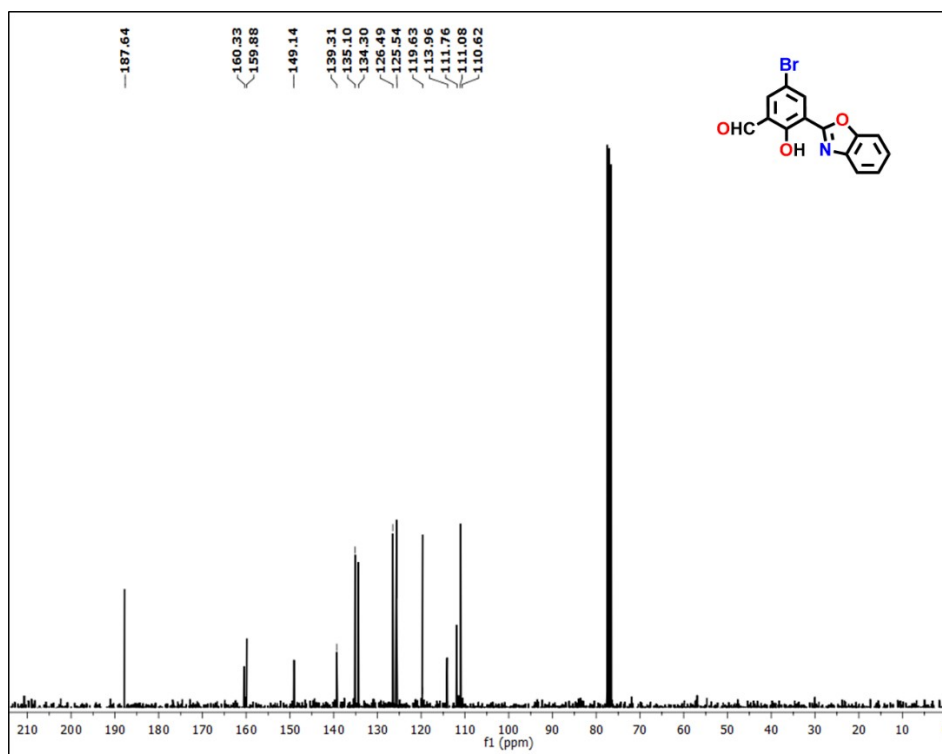

Figure S3:  $^{13}\text{C}$  NMR spectrum of HBOB in  $\text{CDCl}_3$

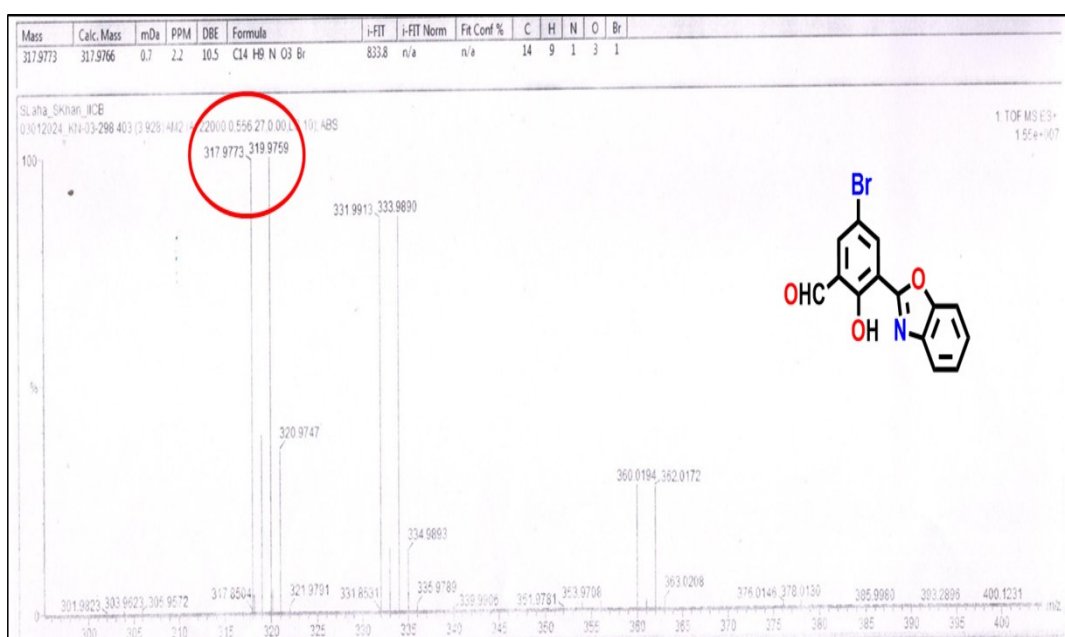

**Figure S4: ESI-MS of HBOB**

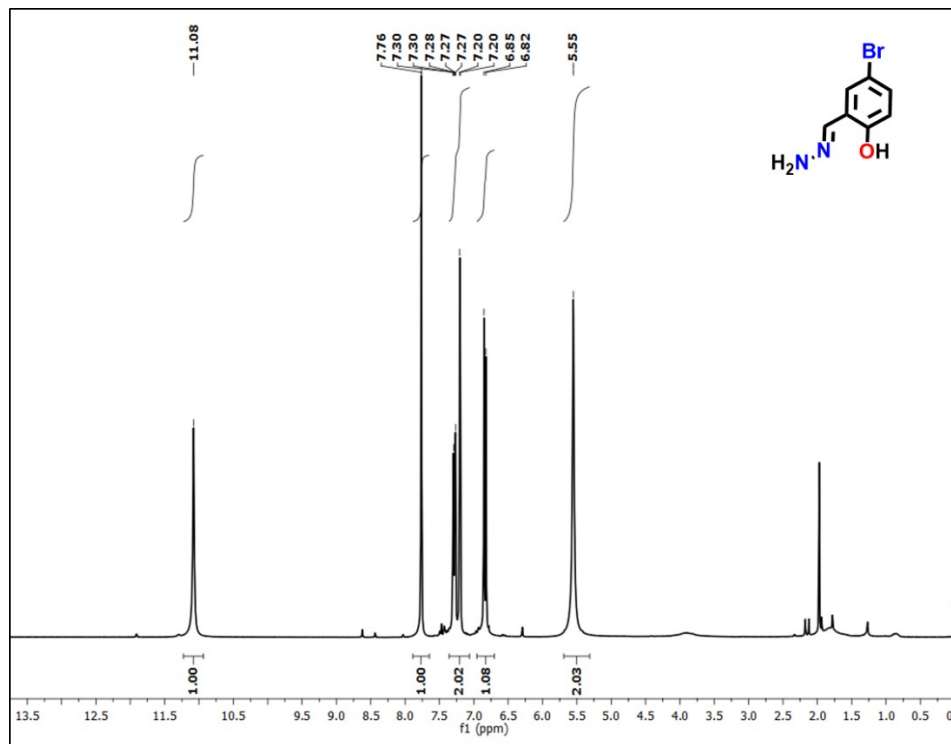

**Figure S5:  $^1\text{H}$  NMR spectrum of HBN in  $\text{CDCl}_3$**

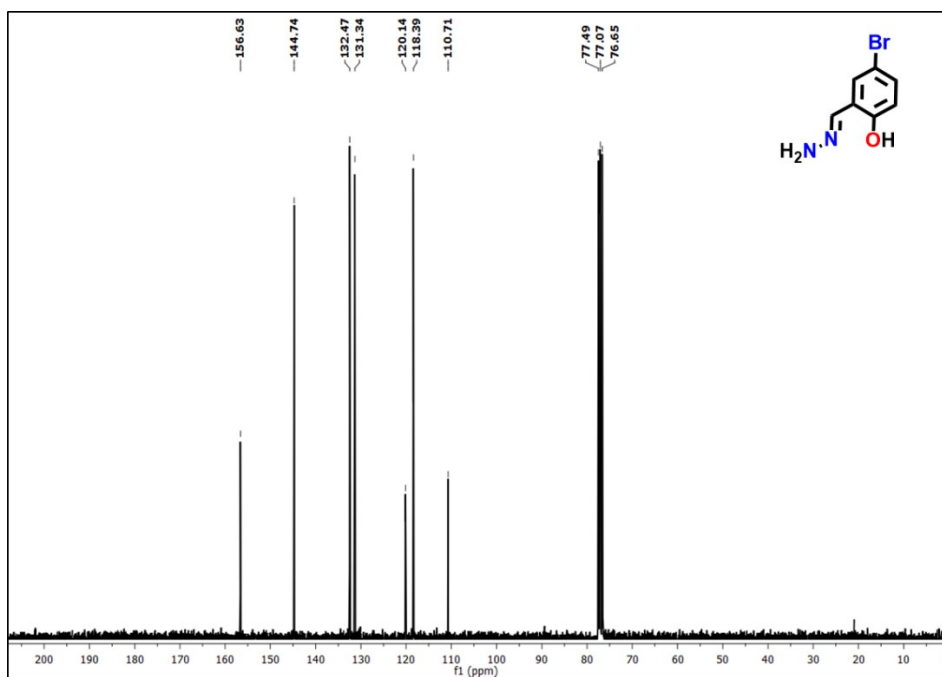

Figure S6:  $^{13}\text{C}$  NMR spectrum of HBN in  $\text{CDCl}_3$

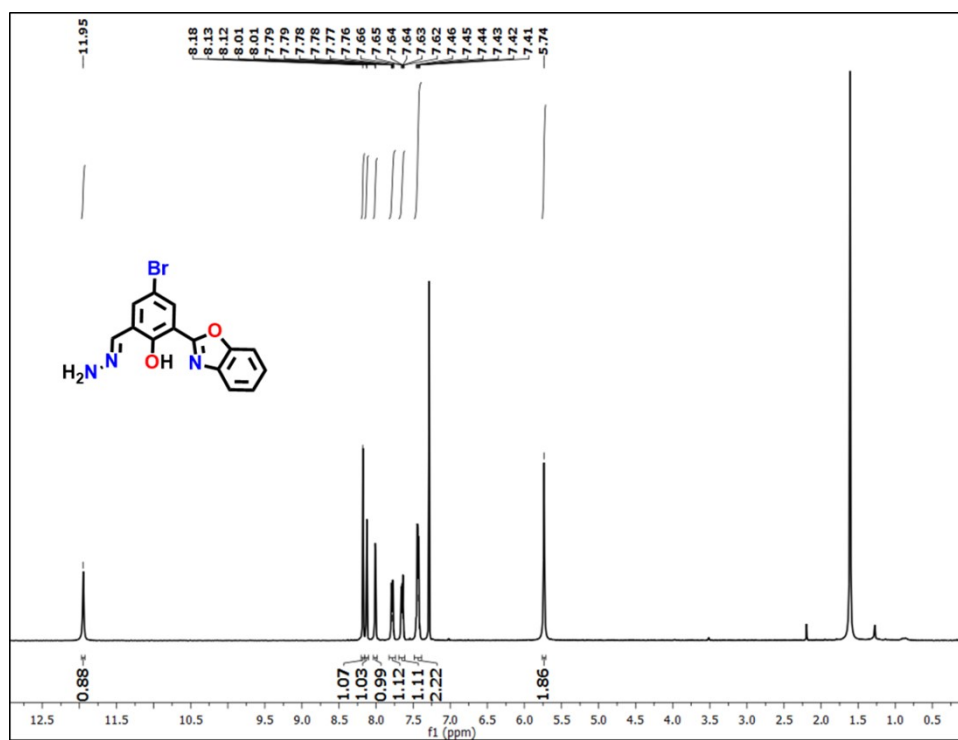

Figure S7:  $^1\text{H}$  NMR spectrum of HBON in  $\text{CDCl}_3$

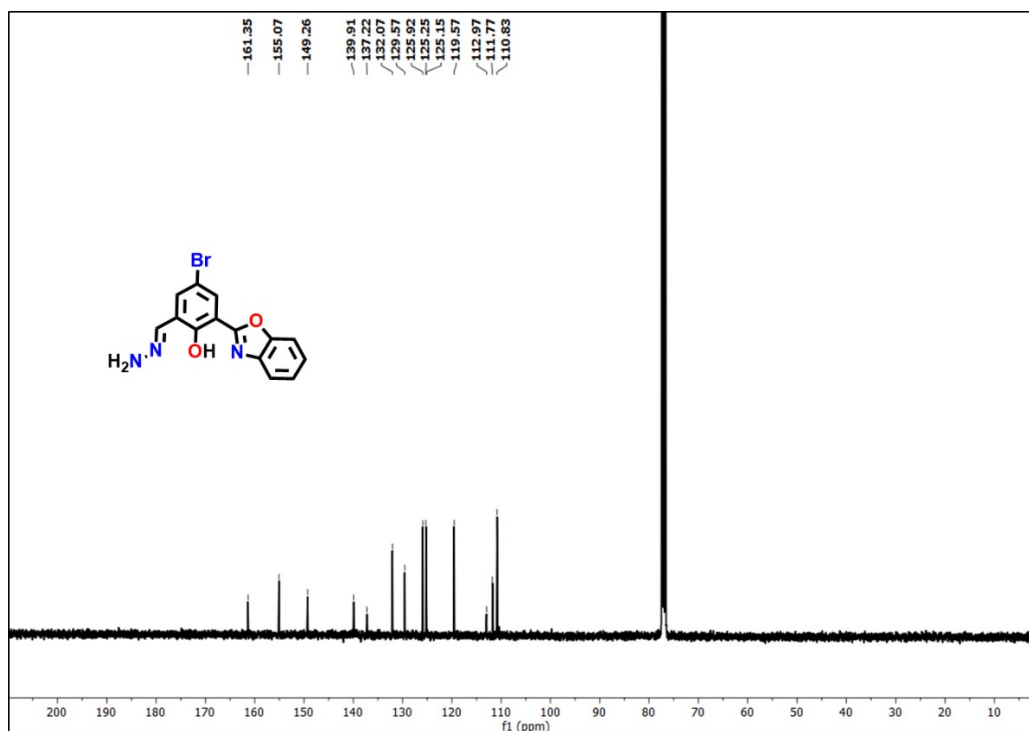

**Figure S8:**  $^{13}\text{C}$  NMR spectrum of **HBON** in  $\text{CDCl}_3$

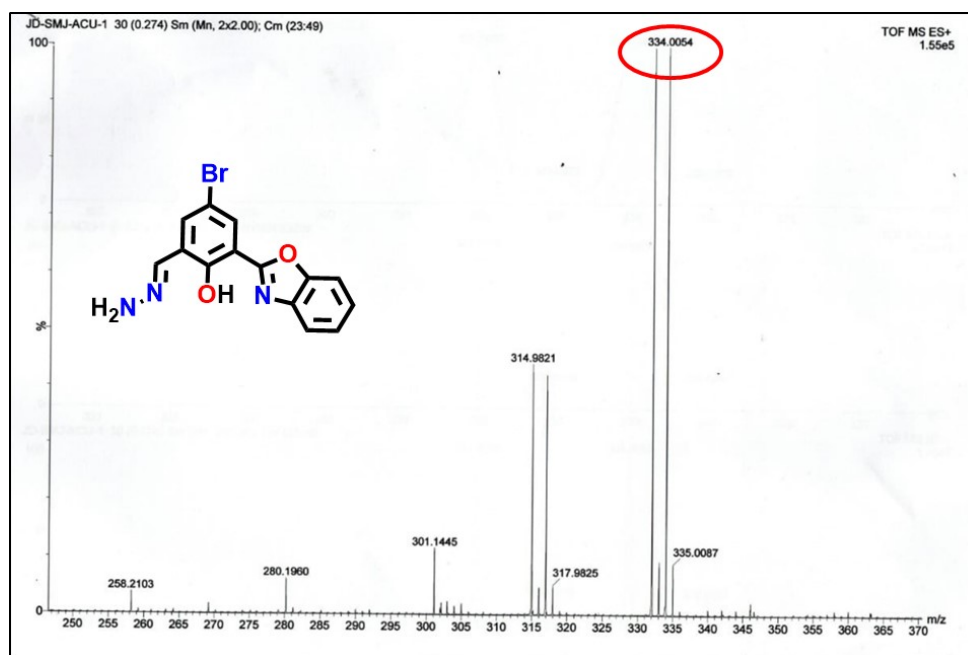

**Figure S9:** ESI-MS of **HBON**

**Table S1.** For Crystallographic Parameters of **HBOB**



| <b>Parameters</b>                      | <b>HBOB</b>                                      |
|----------------------------------------|--------------------------------------------------|
| <b>CCDC</b>                            | 2351952                                          |
| <b>Formula</b>                         | C <sub>14</sub> H <sub>8</sub> BrNO <sub>3</sub> |
| <b>Formula Weight</b>                  | 318.12                                           |
| <b>Crystal System</b>                  | monoclinic                                       |
| <b>Spacegroup</b>                      | P 2 <sub>1</sub> /C <sub>1</sub>                 |
| <b>a [Å]</b>                           | 4.775 (2)                                        |
| <b>b [Å]</b>                           | 11.0709 (5)                                      |
| <b>c [Å]</b>                           | 22.9812 (9)                                      |
| <b>α [°]</b>                           | 90                                               |
| <b>β [°]</b>                           | 95.654 (1)                                       |
| <b>γ [°]</b>                           | 90                                               |
| <b>V [Å<sup>3</sup>]</b>               | 1208.96 (9)                                      |
| <b>h, k, l (max.)</b>                  | 5,13,27                                          |
| <b>Z</b>                               | 4                                                |
| <b>D(calc) [g/cm<sup>-3</sup>]</b>     | 1.748                                            |
| <b>F(000)</b>                          | 632                                              |
| <b>Temperature (K)</b>                 | 273                                              |
| <b>θ Min-Max [°]</b>                   | 3.57, 25.724                                     |
| <b>No. of unique data</b>              | 2299                                             |
| <b>R(int)</b>                          | 0.069                                            |
| <b>Observed data [I &gt; 2.0 σ(I)]</b> | 675                                              |
| <b>R1, wR2</b>                         | 0.0348,0.0687                                    |
| <b>GOF on F<sup>2</sup></b>            | 1.110                                            |

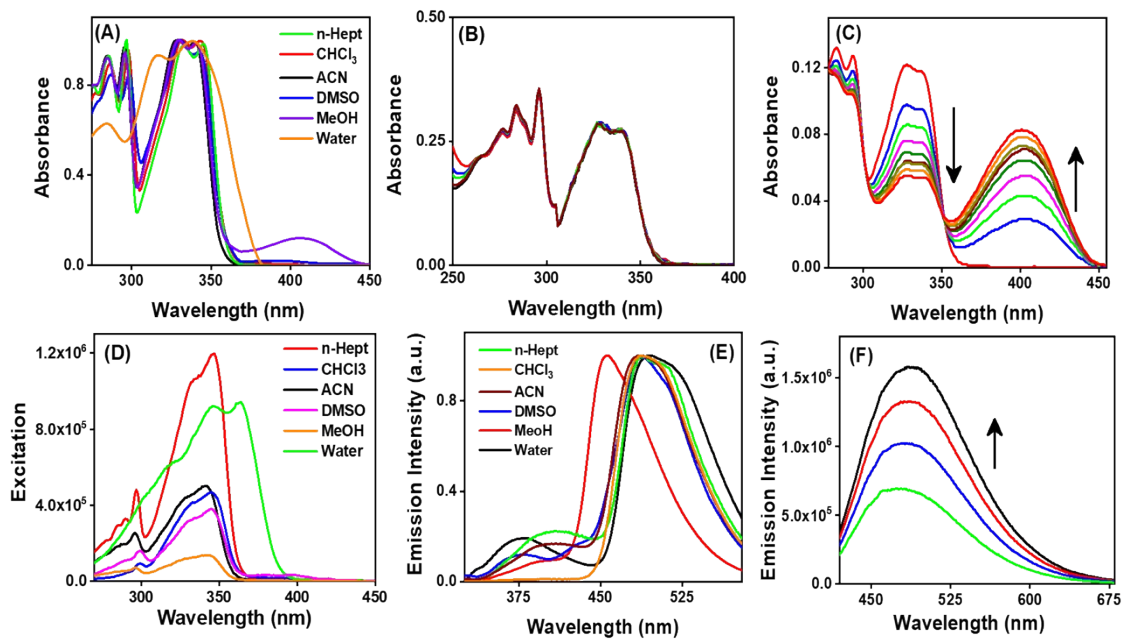

**Figure S10:** Absorption spectra of **HBO** in (A) different solvent, (B) presence of TFA in ACN solvent, (C) presence of TBAOH in ACN solvent, (D) Excitation spectra in different solvents, Emission spectra of **HBO** in (E) different solvents, (F) presence of TBAOH in ACN solvent.

**Table S2:** Table of Steady State Spectra of **HBO**

| <b>Solvents</b>   | <b><math>\lambda_{\text{max}}^{\text{abs}}(\text{nm})</math></b> | <b><math>\lambda_{\text{max}}^{\text{abs}}(\text{nm})</math></b> |
|-------------------|------------------------------------------------------------------|------------------------------------------------------------------|
| HEPT              | 298, 332, 345                                                    | 402,483,513                                                      |
| CHCl <sub>3</sub> | 298, 331, 343                                                    | 402,485,509                                                      |
| ACN               | 298, 329, 343                                                    | 399,484,504                                                      |
| DMSO              | 298, 330, 342                                                    | 402,486,510                                                      |
| MEOH              | 298, 330, 342, 407                                               | 398,456,492                                                      |
| WATER             | 284, 316, 338                                                    | 380,490,519                                                      |
| BASE              | 298, 330, 342, 405                                               | 487                                                              |

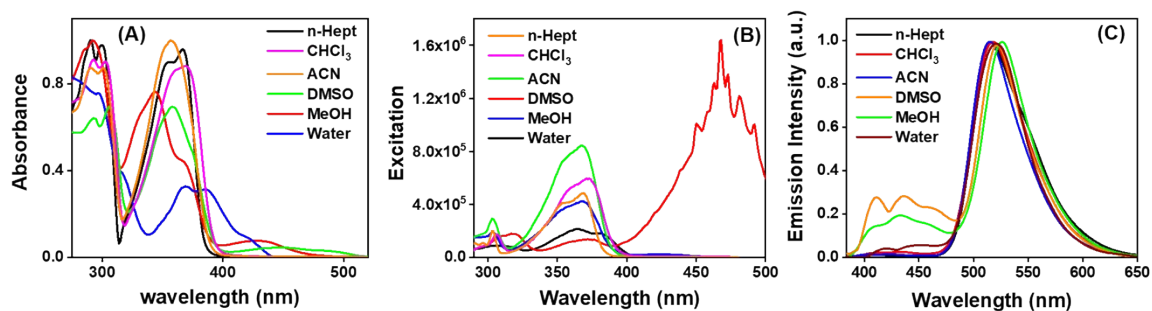

**Figure S11:** (A) Absorption spectra, (B) Excitation spectra, (C) Emission spectra of **HBOB** in different solvents

**Table S3:** Table of Steady State Spectra of **HBOB**

| Solvents                | $\lambda_{\text{max}}^{\text{abs}}(\text{nm})$ | $\lambda_{\text{max}}^{\text{exc}}(\text{nm})$ | Quantum yield   |
|-------------------------|------------------------------------------------|------------------------------------------------|-----------------|
| <b>HEPT</b>             | 298,354,365                                    | 413,518                                        | $0.22 \pm 0.02$ |
| <b>CHCl<sub>3</sub></b> | 297,360,370                                    | 432,519                                        | $0.35 \pm 0.01$ |
| <b>ACN</b>              | 296,351,356                                    | 427,516                                        | $0.30 \pm 0.02$ |
| <b>DMSO</b>             | 297,350,357,458                                | 436,522                                        | $0.12 \pm 0.01$ |
| <b>MEOH</b>             | 291,345,368,432                                | 432,526                                        | $0.23 \pm 0.03$ |
| <b>WATER</b>            | 295,368,386,423                                | 440,520                                        | $0.09 \pm 0.01$ |
| <b>BASE</b>             | 296,351,356,457                                | 520                                            |                 |

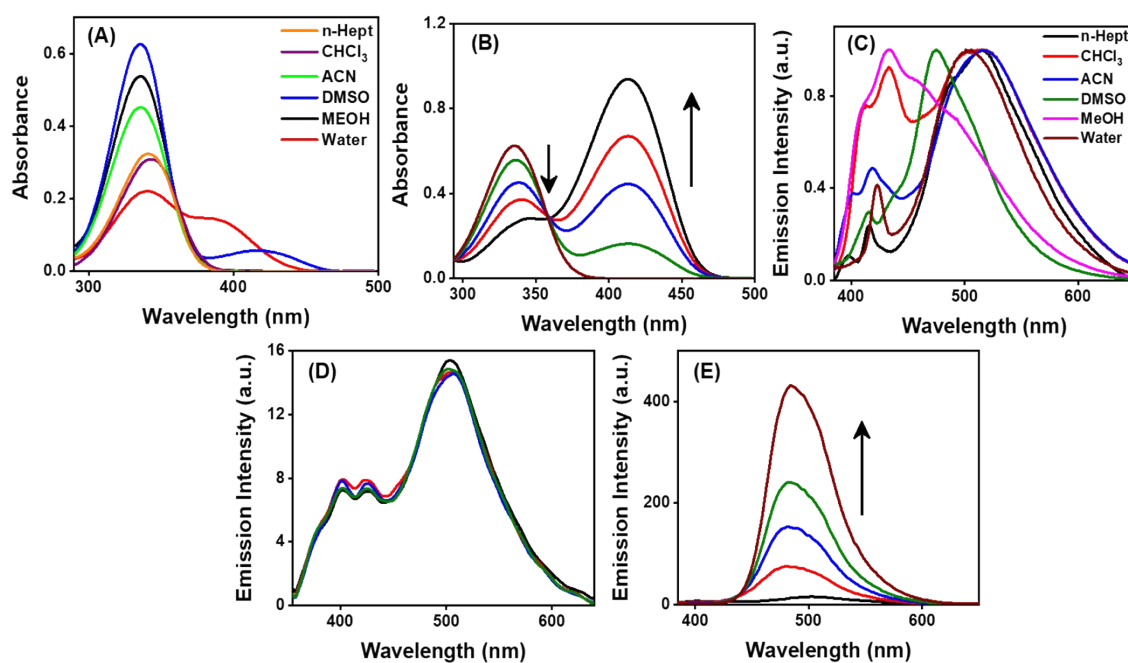

**Figure S12:** Absorption spectra of **HB** in (A) different solvent, (B) presence of TEA in ACN solvent, Emission spectra of **HB** in (E) different solvents, (B) presence of TFA in ACN solvent, (F) presence of TEA in ACN solvent.

**Table S4:** Table of Steady State Spectra of **HB**

| <b>Solvents</b>         | $\lambda^{\text{abs}}_{\text{max}}(\text{nm})$ | $\lambda^{\text{abs}}_{\text{max}}(\text{nm})$ |
|-------------------------|------------------------------------------------|------------------------------------------------|
| <b>HEPT</b>             | 341                                            | 403,515                                        |
| <b>CHCl<sub>3</sub></b> | 342                                            | 431,514                                        |
| <b>ACN</b>              | 336                                            | 413,517                                        |
| <b>DMSO</b>             | 335,420                                        | 414,476                                        |
| <b>MEOH</b>             | 336                                            | 435,491                                        |
| <b>WATE</b>             | 339,391                                        | 403,504                                        |
| <b>R</b>                |                                                |                                                |
| <b>BASE</b>             | 343,412                                        | 483                                            |

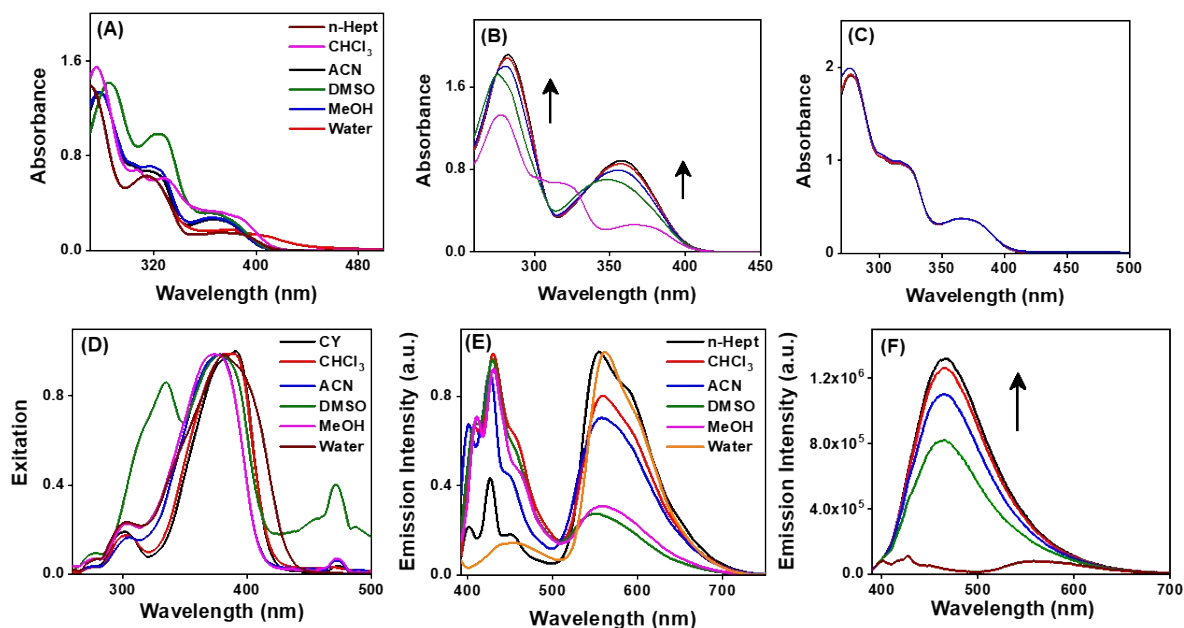

**Figure S13:** Absorption spectra of **HBN** in (A) different solvent, (B) presence of TEA in ACN solvent, (C) presence of TEA in ACN solvent, (D) Excitation spectra of HB, Emission spectra of HB in (E) different solvents, (F) presence of TFA in ACN solvent.

**Table S5:** Table of Steady State Spectra of **HBN**

| Solvents          | $\lambda^{\text{abs}}_{\text{max}}(\text{nm})$ | $\lambda^{\text{em}}_{\text{max}}(\text{nm})$ |
|-------------------|------------------------------------------------|-----------------------------------------------|
| HEPT              | 273,316,385                                    | 430,554,588                                   |
| CHCl <sub>3</sub> | 276,327,382                                    | 430,558,587                                   |
| ACN               | 278,319,370                                    | 429,560                                       |
| DMSO              | 285,325,371                                    | 430,551                                       |
| MEOH              | 378,320,370                                    | 430,557                                       |
| WATE              | 270,314,390                                    | 452,560                                       |

R

ACID 270,358 463

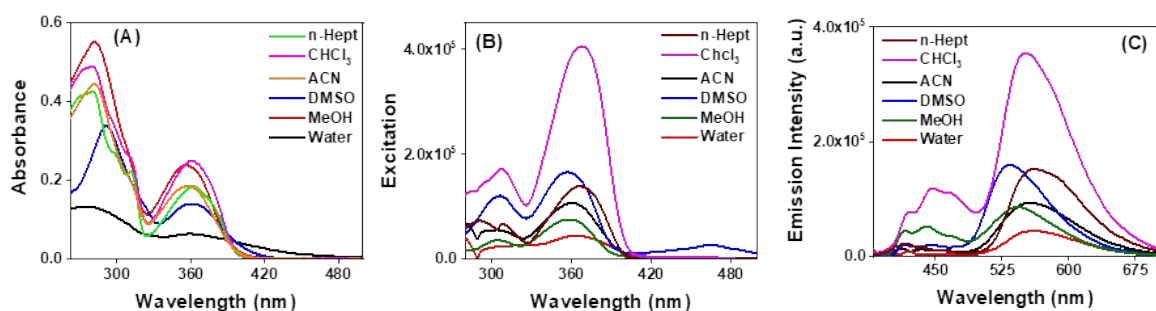

**Figure S14:** (A) Absorption spectra, (B) Excitation spectra, (C) Emission spectra of **HBON** in different solvents.

**Table S6:** Table of Steady State Spectra of **HBON**

| Solvents          | $\lambda_{\text{max}}^{\text{abs}}(\text{nm})$ | $\lambda_{\text{max}}^{\text{abs}}(\text{nm})$ | Quantum yield   |
|-------------------|------------------------------------------------|------------------------------------------------|-----------------|
| HEPT              | 281,362                                        | 437,559,584                                    | $0.15 \pm 0.01$ |
| CHCl <sub>3</sub> | 280,361                                        | 445,551                                        | $0.20 \pm 0.02$ |
| ACN               | 282,358                                        | 438,547                                        | $0.10 \pm 0.01$ |
| DMSO              | 291,361                                        | 440,532                                        | $0.09 \pm 0.01$ |



|             |         |         |                 |
|-------------|---------|---------|-----------------|
| <b>MEOH</b> | 292,356 | 441,541 | $0.13 \pm 0.02$ |
| <b>WATE</b> | 292,362 | 421,561 | $0.12 \pm 0.01$ |
| <b>R</b>    |         |         |                 |
| <b>BASE</b> | 358,440 | 445,500 | $0.22 \pm 0.03$ |
| <b>ACID</b> | 280,382 | 560     | $0.30 \pm 0.02$ |

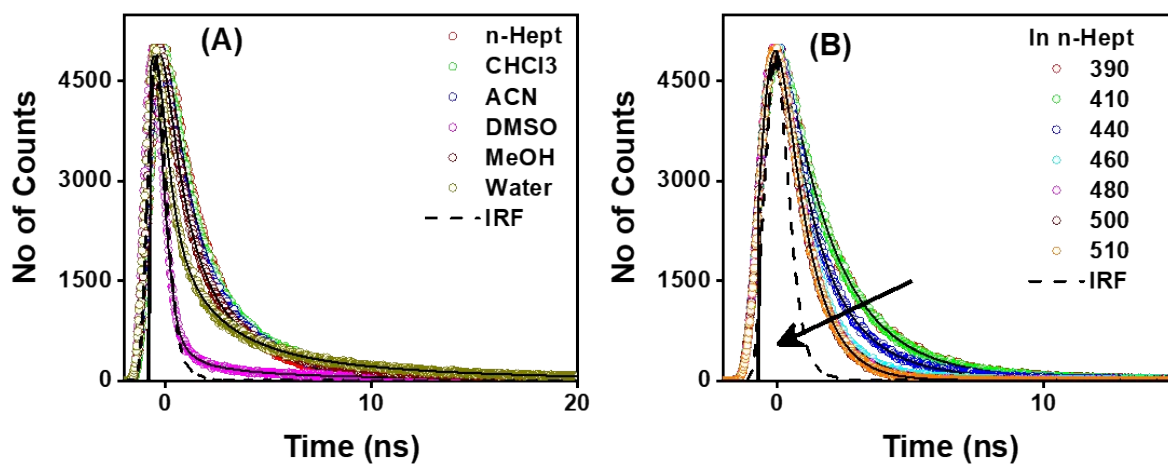

**Figure S15:** Emission decays of **HBO** in ( $\lambda_{\text{ex}}=314\text{nm}$ ) (A) various solvents at 390nm (B) n-Hept at different monitoring wavelength. The dashed lines represent the IRF of the instrument. The black solid lines represent the best multiexponential fit provided to the emission decay signals.

**Table S7.** Excited state lifetime parameters of **HBO**

| <b>solvent</b>          | <b>Wavelength(nm</b> | <b><math>\tau_1/\alpha_1</math></b> | <b><math>\tau_2/\alpha_2</math></b> | <b><math>\tau_3/\alpha_3</math></b> |
|-------------------------|----------------------|-------------------------------------|-------------------------------------|-------------------------------------|
| <b>HEPT</b>             | <b>390</b>           | 0.63/7                              | 1.89/82                             | 5/11                                |
| <b>HEPT</b>             | <b>410</b>           | 0.61/5                              | 1.87/85                             | 4.76/10                             |
| <b>HEPT</b>             | <b>440</b>           | 0.79/31                             | 1.81/69                             |                                     |
| <b>HEPT</b>             | <b>460</b>           | 0.90/80                             | 1.95/20                             |                                     |
| <b>HEPT</b>             | <b>500</b>           | 0.94/100                            |                                     |                                     |
| <b>HEPT</b>             | <b>510</b>           | 0.97/100                            |                                     |                                     |
| <b>CHCl<sub>3</sub></b> | <b>390</b>           | 0.65/19                             | 2.07/55                             | 6.09/26                             |
| <b>CHCl<sub>3</sub></b> | <b>510</b>           | 1.12/100                            |                                     |                                     |
| <b>DMSO</b>             | <b>390</b>           | 0.148/73                            | 2.38/11                             | 11.65/1                             |
| <b>DMSO</b>             | <b>510</b>           | 0.33/84                             | 2.03/16                             |                                     |
| <b>ACN</b>              | <b>390</b>           | 0.35/16                             | 1.98/59                             | 7.14/25                             |
| <b>ACN</b>              | <b>510</b>           | 0.328/98                            | 1.48/2                              |                                     |
| <b>MeOH</b>             | <b>390</b>           | 0.58/22                             | 1.86/48                             | 7.19/30                             |
| <b>MeOH</b>             | <b>500</b>           | 0.38/56                             | 1.557/2                             | 0.40/42                             |

|                  |     |         |         |         |
|------------------|-----|---------|---------|---------|
| MeOH             | 510 | 0.30/91 | 2.48/5  | 0.93/4  |
| H <sub>2</sub> O | 390 | 0.39/31 | 2.24/32 | 0.93/4  |
| H <sub>2</sub> O | 510 | -       | 1.7/6   | 5.96/94 |

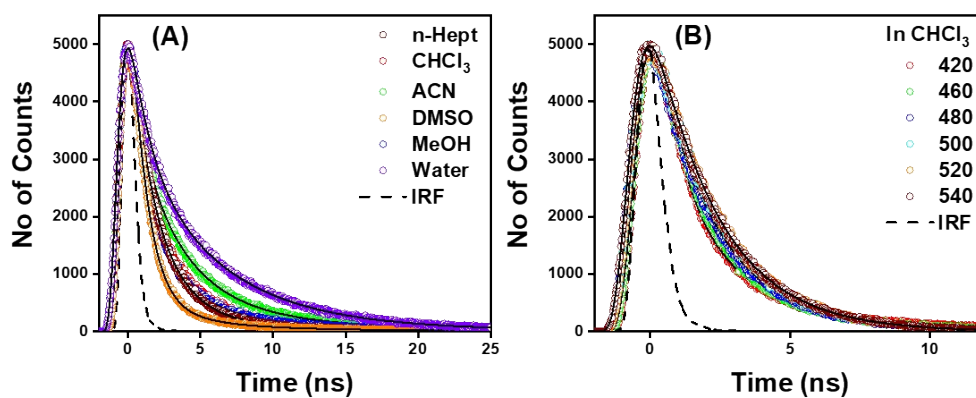

**Figure S16:** Emission decays of HBOB in ( $\lambda_{\text{ex}}=314\text{nm}$ ) (A) various solvents at 410 nm (B) CHCl<sub>3</sub> at different monitoring wavelength. The dashed lines represent the IRF of the instrument. The black solid lines represent the best multiexponential fit provided to the emission decay signals.

**Table S8.** Excited state lifetime parameters of HBOB

| solvent | Wavelength (nm) | $\tau_1/\alpha_1$ (ns) | $\tau_2/\alpha_2$ (ns) | $\tau_3/\alpha_3$ (ns) |
|---------|-----------------|------------------------|------------------------|------------------------|
|         |                 |                        |                        |                        |

|                         |            |         |          |          |
|-------------------------|------------|---------|----------|----------|
| <b>HEPT</b>             | <b>420</b> | 0.88/18 | 2.18/69  | 8.65/13  |
| <b>HEPT</b>             | <b>520</b> |         | 2.19/100 |          |
| <b>CHCl<sub>3</sub></b> | <b>420</b> | 0.74/24 | 2.3/63   | 9/14     |
| <b>CHCl<sub>3</sub></b> | <b>460</b> | 0.65/10 | 2.09/81  | 6.77/8   |
| <b>CHCl<sub>3</sub></b> | <b>480</b> | 0.75/12 | 2.17/89  |          |
| <b>CHCl<sub>3</sub></b> | <b>500</b> | 0.87/72 | 2.21/93  |          |
| <b>CHCl<sub>3</sub></b> | <b>520</b> |         | 2.27/100 |          |
| <b>CHCl<sub>3</sub></b> | <b>540</b> |         | 2.18/100 |          |
| <b>DMSO</b>             | <b>420</b> | 0.98/71 | 3.34/19  | 12.83/10 |
| <b>DMSO</b>             | <b>520</b> |         | 2.34/100 |          |
| <b>ACN</b>              | <b>420</b> | 0.54/14 | 3.0/57   | 8.86/29  |
| <b>ACN</b>              | <b>520</b> |         | 2.37/100 |          |
| <b>MeOH</b>             | <b>420</b> | 0.78/29 | 2.54/50  | 8.75/21  |
| <b>MeOH</b>             | <b>520</b> | 0.74/35 | 2.46/65  |          |
| <b>H<sub>2</sub>O</b>   | <b>420</b> | 1.15/16 | 5.46/73  | 13.48/11 |
| <b>H<sub>2</sub>O</b>   | <b>520</b> | 1.13/25 | 2.72/75  |          |
| <b>BASE</b>             | <b>520</b> |         | 2.37/100 |          |

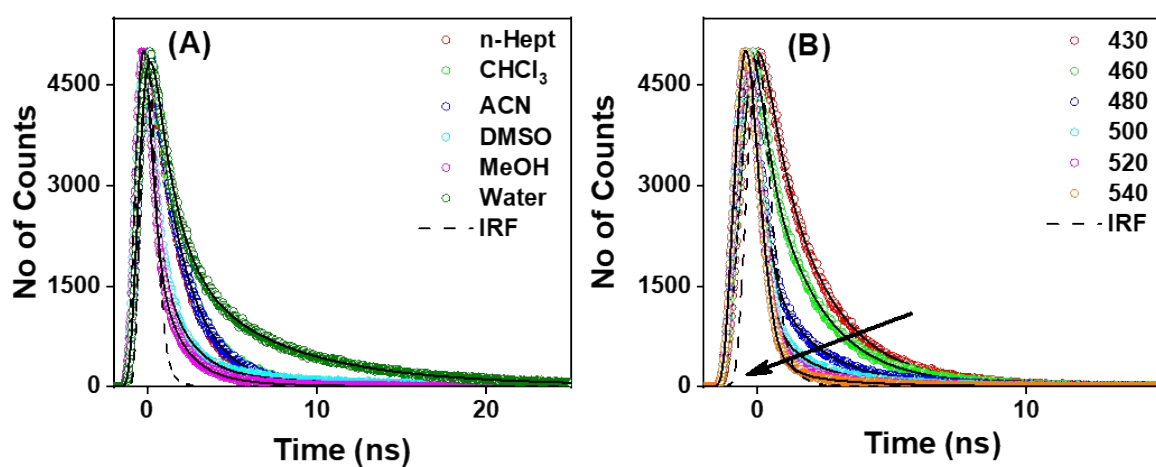

**Figure S17:** Emission decays of **HB** in ( $\lambda_{\text{ex}}=314\text{nm}$ ) (A) various solvents at 410 nm (B)  $\text{CHCl}_3$  at different monitoring wavelength. The dashed lines represent the IRF of the instrument. The black solid lines represent the best multiexponential fit provided to the emission decay signals.

**Table S9.** Excited state lifetime parameters of **HB**

| Solvent | Wavelength(nm | $\tau_1(\text{ns})/\alpha_1$ | $\tau_2(\text{ns})/\alpha_2$ | $\tau_3(\text{ns})/\alpha_3$ |
|---------|---------------|------------------------------|------------------------------|------------------------------|
| )       |               |                              |                              |                              |

|                         |            |           |           |          |
|-------------------------|------------|-----------|-----------|----------|
| <b>Heptane</b>          | <b>430</b> | 1.28/62%  | 2.7/37%   | -        |
| <b>Heptane</b>          | <b>500</b> | 0.08/79%  | 1.9/20%   | -        |
| <b>CHCl<sub>3</sub></b> | <b>430</b> | 0.5/14.8% | 1.9/80%   | 5.8/4.3% |
| <b>CHCl<sub>3</sub></b> | <b>460</b> | 0.1/26.3% | 1.8/65.6% | 4.9/8%   |
| <b>CHCl<sub>3</sub></b> | <b>480</b> | 0.1/54%   | 1.7/38%   | 4.6/7%   |
| <b>CHCl<sub>3</sub></b> | <b>500</b> | 0.1/72%   | 1.7/22%   | 4.6/5%   |
| <b>CHCl<sub>3</sub></b> | <b>520</b> | 0.1/84%   | 2.4/15%   | -        |
| <b>CHCl<sub>3</sub></b> | <b>540</b> | 0.1/88%   | 2.6/11%   | -        |
| <b>DMSO</b>             | <b>430</b> | 0.2/37%   | 1.6/44%   | 10/19%   |
| <b>DMSO</b>             | <b>490</b> | 0.17/23%  | 2.9/65%   | 11/11%   |
| <b>MeOH</b>             | <b>430</b> | 0.15/51%  | 1.4/39%   | 4.2/10%  |
| <b>MeOH</b>             | <b>490</b> | 0.1/51.4% | 1.3/36%   | 3.6/11%  |
| <b>H<sub>2</sub>O</b>   | <b>430</b> | 1.14/31%  | 5.5/54%   | 14/15%   |
| <b>H<sub>2</sub>O</b>   | <b>490</b> | 0.7/37%   | 3.1/35%   | 10/28%   |
| <b>Base</b>             | <b>490</b> | 0.35/27   | 2.9/73    |          |

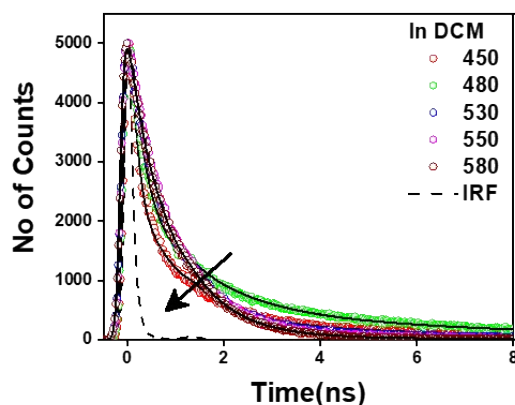

**Figure S18:** Emission decays of **HBON** in ( $\lambda_{ex}=403\text{nm}$ ) DCM at different monitoring wavelength. The dashed lines represent the IRF of the instrument. The black solid lines represent the best multiexponential fit provided to the emission decay signals

**Table S10.** Excited state lifetime parameters of **HBON**

| solvent | Wavelength(nm) | $\tau_1$ | $\alpha_1$ | $\tau_2$ | $\alpha_2$ | $\tau_3$ | $\alpha_3$ | $\chi^2$ |
|---------|----------------|----------|------------|----------|------------|----------|------------|----------|
| HEPT    | 550            |          |            | 0.722    | 92.24%     | 2.197    | 7.76%      | 1.13     |
| HEPT    | 530            | 0.084    | 10.84%     | 0.811    | 79.63%     | 4.480    | 9.53%      | 1.02     |
| HEPT    | 480            | 0.062    | 23.25%     | 1.264    | 28.04%     | 5.195    | 48.71%     | 1.05     |

|                         |            |        |        |        |        |       |        |      |
|-------------------------|------------|--------|--------|--------|--------|-------|--------|------|
| <b>CHCl<sub>3</sub></b> | <b>550</b> | 0.114  | 11.69% | 1.180  | 76.25% | 5.394 | 12.07% | 1.02 |
| <b>DCM</b>              | <b>580</b> | 0.092  | 6.39%  | 0.876  | 87.5%  | 4.727 | 6.11%  | 1.10 |
| <b>DCM</b>              | <b>550</b> | 0.097  | 6.68%  | 0.886  | 83.25% | 5.186 | 10.07% | 0.93 |
| <b>DCM</b>              | <b>530</b> | 0.129  | 7.17%  | 0.886  | 76.46% | 5.568 | 16.37% | 1.04 |
| <b>DCM</b>              | <b>480</b> | 0.224  | 16.62% | 1.321  | 36.6%  | 6.397 | 46.78% | 1.02 |
| <b>DMSO</b>             | <b>480</b> | 0.135  | 16.46% | 0.731  | 38.83% | 3.150 | 44.71% | 1.00 |
| <b>DMSO</b>             | <b>550</b> | 0.187  | 40.68% | 0.723  | 37.09% | 2.408 | 22.23% | 1.00 |
| <b>ACN</b>              | <b>480</b> | 0.055  | 29.4%  | 0.636  | 51.02% | 3.781 | 19.59% | 1.23 |
| <b>ACN</b>              | <b>550</b> |        |        | 0.399  | 79.85% | 0.849 | 20.15% | 1.20 |
| <b>MeOH</b>             | <b>480</b> | 0.0866 | 39.94% | 0.747  | 41.02% | 2.537 | 19.04% | 1.15 |
| <b>MeOH</b>             | <b>550</b> | 0.1273 | 48.42% | 0.586  | 41.69% | 2.50  | 9.89%  | 0.95 |
| <b>H<sub>2</sub>O</b>   | <b>550</b> | 0.037  | 18.05% | 0.723  | 22.43% | 1.731 | 59.52% | 1.16 |
| <b>ACID</b>             | <b>550</b> | 0.089  | 2.82%  | 2.059  | 97.18% |       |        | 0.99 |
| <b>ACID</b>             | <b>480</b> | 0.094  | 6.07%  | 0.6777 | 66.0%  | 3.762 | 27.93% | 1.01 |
| <b>BASE</b>             | <b>450</b> | 0.0745 | 7.4%   | 1.35   | 61.17% | 3.50  | 31.43% | 0.95 |



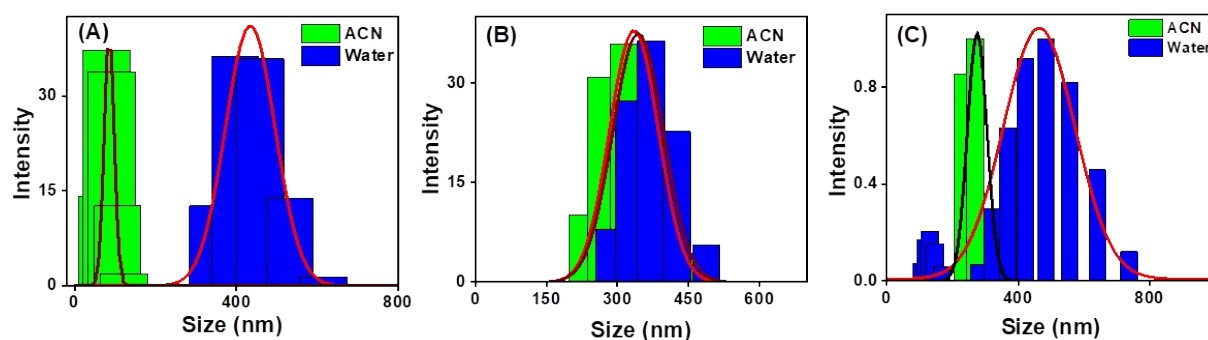

Figure S19: Dynamic Light Scattering spectra of (A) HBO, (B) HBOB, (C) HBON

### Solvent abbreviation Index

| Abbreviatio       | Solvent name      |
|-------------------|-------------------|
| n                 |                   |
| H                 | Heptane           |
| CHCl <sub>3</sub> | Chloroform        |
| DCM               | Dichloromethane   |
| ACN               | Acetonitrile      |
| DMSO              | DimethylSulfoxide |
| MeOH              | Methanol          |
| W                 | Water             |

---

THF            Tetrahydrofuran

---

TFA            Trifluoroacetic Acid

---

TEA            Triethylamine

---

TBAOH        Tetrabutylammonium Hydroxide

---
